# Supplementary material for: Two dimensional layered Co0.85Se nanosheets as a high-capacity anode for lithium-ion batteries
Source: Royal Society of Chemistry journal article supplement (doi:10.1039/c6nr03571j), 2016-01-01
Supplement: c6nr03571j1.pdf [file c6nr03571j1.pdf]

## ELECTRONIC SUPPORTING INFORMATION

### **Two Dimensional Layered $\text{Co}_{0.85}\text{Se}$ Nanosheets as a high-capacity anode for Lithium-ion batteries**

Jisheng Zhou,<sup>a,b,‡</sup> Ye Wang,<sup>a,‡</sup> Jun Zhang,<sup>c</sup> Tupei Chen,<sup>c</sup> Huaihe Song,<sup>b,\*</sup> Hui Ying Yang,<sup>a,\*</sup>

<sup>a</sup>*Pillar of Engineering Product Development, Singapore University of Technology and Design, 8 Somapah Road, 487372, Singapore*

<sup>b</sup>*State Key Laboratory of Chemical Resource Engineering, Key Laboratory of Carbon Fiber and Functional Polymers, Ministry of Education, Beijing University of Chemical Technology, Beijing, P. R. China.*

<sup>c</sup>*School of Electrical and Electronic Engineering, Nanyang Technological University, Singapore 639798, Singapore*

‡ These authors contribute equally to this work.

\*Corresponding author. Tel.: +65 6303 6663; Fax: +65 6779 5161. E-mail address: songhh@mail.buct.edu.cn (H. H. Song); yanghuiying@sutd.edu.sg (H. Y. Yang)

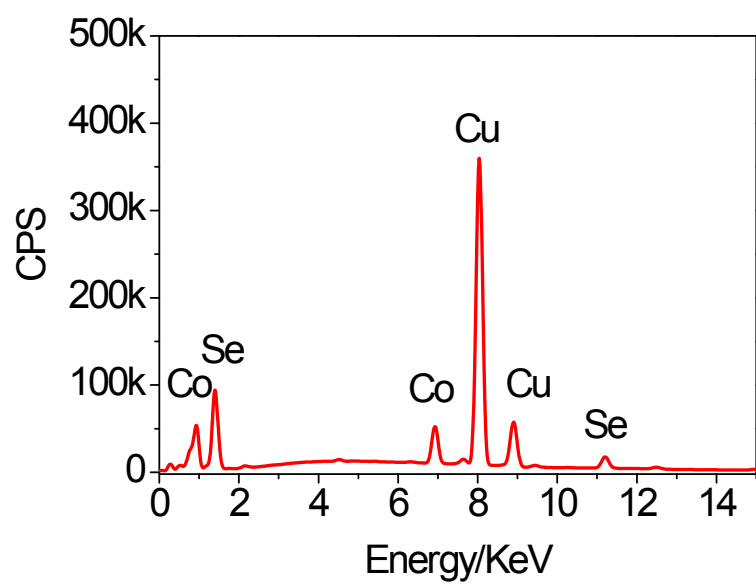

**Figure S1.** EDS spectrum of layered  $\text{Co}_{0.85}\text{Se}$  nanosheets.

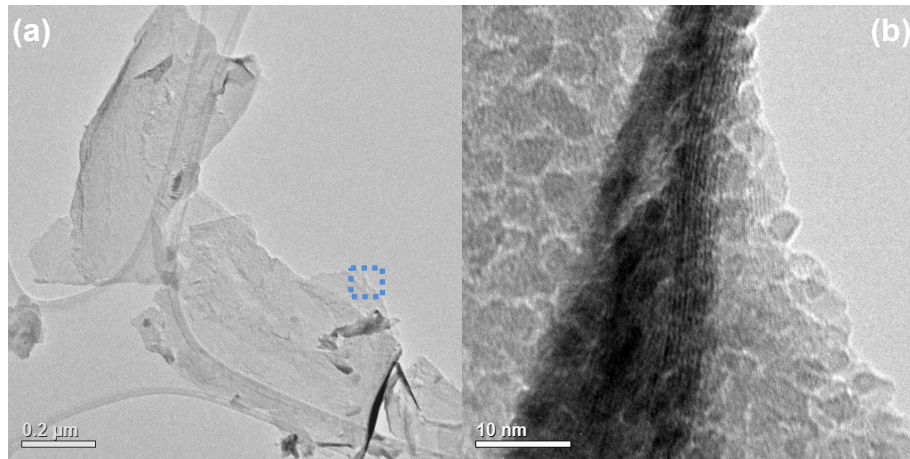

**Figure S2.** (a) TEM image of layered  $\text{Co}_{0.85}\text{Se}$  nanosheets and (b) HRTEM image of  $\text{Co}_{0.85}\text{Se}$  nanosheets in the selected area in the blue box of image (a).

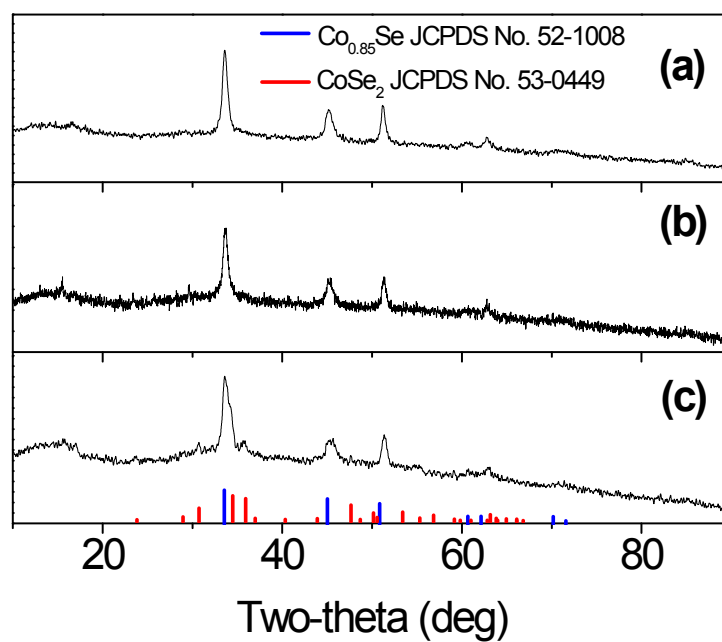

**Figure S3.** XRD patterns of the samples prepared at various mole ratios of precursors  $\text{Co}(\text{AC})_2/\text{Na}_2\text{SeO}_3$ : (a) 1:0.5, (b) 1:0.75 and (c) 1:1.5.

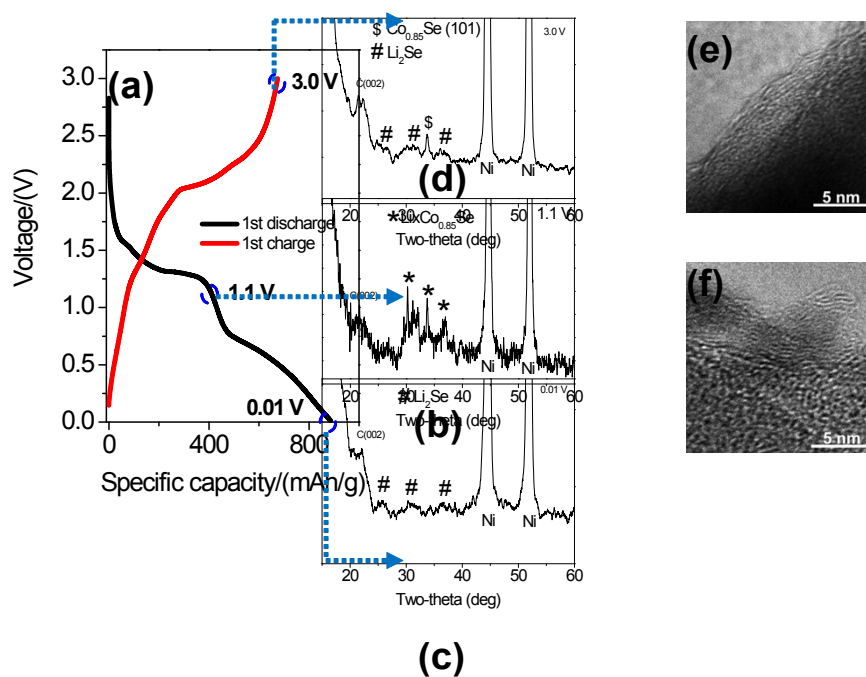

**Figure S4.** (a) Initial discharge/charge curves of  $\text{Co}_{0.85}\text{Se}$  nanosheets at the current density of  $100 \text{ mA g}^{-1}$ ; XRD patterns of  $\text{Co}_{0.85}\text{Se}$  nanosheet electrode at various voltage of (b) 1.1 V, (c) 0.01 V, and (d) 3.0 V; and HRTEM image of  $\text{Co}_{0.85}\text{Se}$  nanosheet at (e) 1.1 V and (f) 3.0 V.

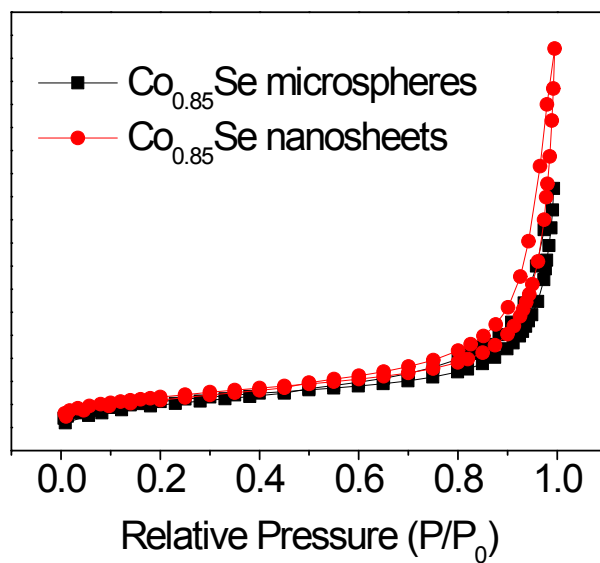

**Figure S5.** Nitrogen adsorption-desorption isotherms of  $\text{Co}_{0.85}\text{Se}$  nanosheets and  $\text{Co}_{0.85}\text{Se}$  microspheres.

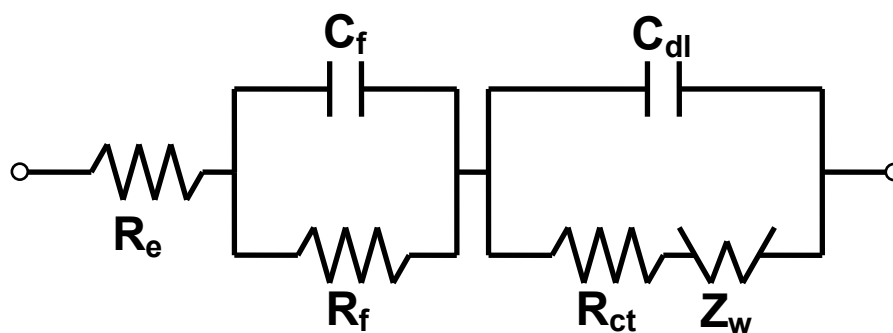

**Figure S6.** Equivalent circuit:  $R_e$  is the electrolyte resistance;  $C_f$  and  $R_f$  are the capacitance and resistance of the surface film formed on the electrodes, respectively;  $C_{dl}$  and  $R_{ct}$  are the double-layer capacitance and charge-transfer resistance, respectively;  $Z_w$  is the Warburg impedance related to the diffusion of lithium ions into the bulk electrodes.

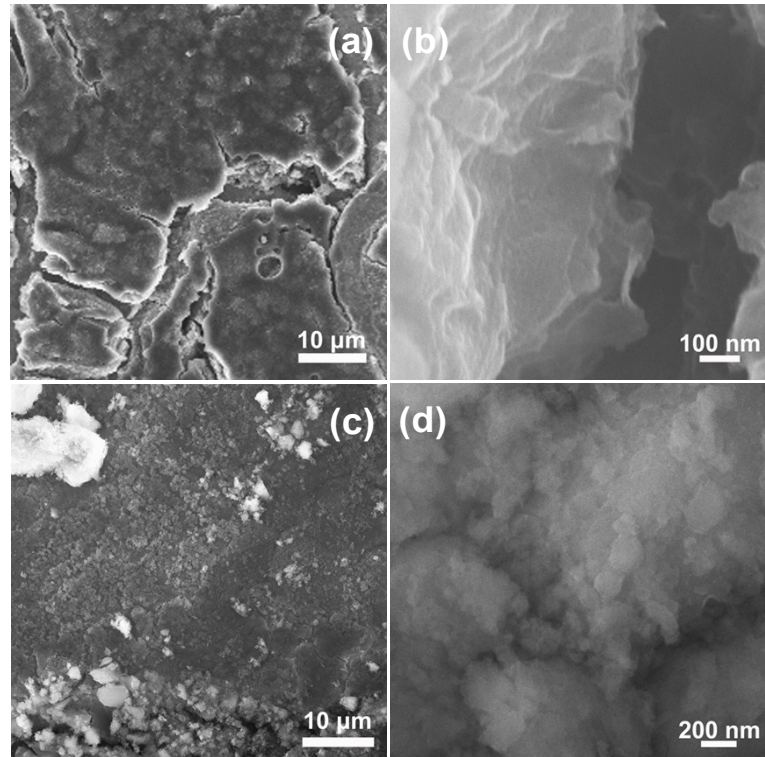

**Figure S7.** SEM images of (a, b)  $\text{Co}_{0.85}\text{Se}$  nanosheets electrode and (c, d)  $\text{Co}_{0.85}\text{Se}$  microspheres electrodes.
